# Supplementary material for: Influence of Low Air Pressure on the Partial Denitrification-Anammox (PD/A) Process
Source: MDPI journal article supplement (doi:10.3390/su15139907), 2023-06-21
Supplement: s1 [file s1]

# Influence of Low Air Pressure on the Partial Denitrification-Anammox (PD/A) Process

Wen Dai <sup>1</sup>, Zhenpeng Han <sup>1</sup>, Yongze Lu <sup>1</sup>, Shuping Li <sup>2,3</sup>, Gangyin Yan <sup>2,3</sup> and Guangcan Zhu <sup>1,2,\*</sup>

<sup>1</sup> Department of Environmental Science and Engineering, School of Energy and Environment, Southeast University, Nanjing 210096, China

<sup>2</sup> Key Laboratory of Water Pollution Control and Ecological Restoration of Xizang, National Ethnic Affairs Commission, Xizang Minzu University, Xianyang 712082, China

<sup>3</sup> Information Engineer College, Xizang Minzu University, Xianyang 712082, China

\* Correspondence: gc-zhu@seu.edu.cn

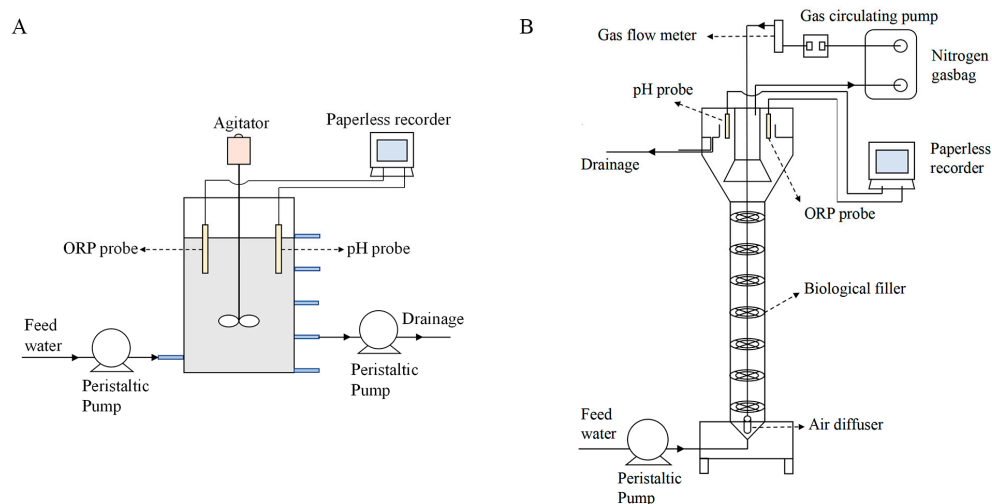

**Figure S1.** Schematic diagram of (A)SBR system (B)USR system.

**Table S1.** The composition of synthetic wastewater for (a) SBR-PD (b) SBR-A (c) USR-PD/A.

(a)

| Component                            | Concentration (mg/L) | Component                             | Concentration (mg/L) |
|--------------------------------------|----------------------|---------------------------------------|----------------------|
| NO <sub>3</sub> <sup>-</sup> -N      | 50                   | KI                                    | 0.18                 |
| COD(CH <sub>3</sub> COONa)           | 140                  | H <sub>3</sub> BO <sub>4</sub>        | 0.15                 |
| NH <sub>4</sub> <sup>+</sup> -N      | 5                    | CoCl <sub>2</sub> ·6H <sub>2</sub> O  | 0.15                 |
| PO <sub>4</sub> <sup>3-</sup> -P     | 5                    | ZnSO <sub>4</sub> ·7H <sub>2</sub> O  | 0.12                 |
| CaCl <sub>2</sub> ·2H <sub>2</sub> O | 0.03                 | MnCl <sub>2</sub> ·4H <sub>2</sub> O  | 0.12                 |
| MgSO <sub>4</sub> ·7H <sub>2</sub> O | 0.06                 | NaMoO <sub>4</sub> ·2H <sub>2</sub> O | 0.06                 |
| FeCl <sub>3</sub> ·6H <sub>2</sub> O | 1.5                  | CuSO <sub>4</sub> ·5H <sub>2</sub> O  | 0.06                 |

(b)

| Component                            | Concentration (mg/L) | Component                            | Concentration (mg/L) |
|--------------------------------------|----------------------|--------------------------------------|----------------------|
| NH <sub>4</sub> <sup>+</sup> -N      | 50                   | ZnSO <sub>4</sub> ·7H <sub>2</sub> O | 0.43                 |
| NO <sub>2</sub> <sup>-</sup> -N      | 65                   | CoCl <sub>2</sub> ·6H <sub>2</sub> O | 0.24                 |
| KHCO <sub>3</sub>                    | 500                  | MnCl <sub>2</sub> ·4H <sub>2</sub> O | 0.99                 |
| CaCl <sub>2</sub> ·2H <sub>2</sub> O | 180                  | CuSO <sub>4</sub> ·5H <sub>2</sub> O | 0.25                 |

|                                      |     |                                       |       |
|--------------------------------------|-----|---------------------------------------|-------|
| MgSO <sub>4</sub> ·7H <sub>2</sub> O | 300 | NaMoO <sub>4</sub> ·2H <sub>2</sub> O | 0.22  |
| KH <sub>2</sub> PO <sub>4</sub>      | 30  | NiCl <sub>2</sub> ·6H <sub>2</sub> O  | 0.19  |
| FeSO <sub>4</sub>                    | 5.0 | H <sub>3</sub> BO <sub>4</sub>        | 0.014 |

(c)

| Component                            | Concentration (mg/L) | Component                             | Concentration (mg/L) |
|--------------------------------------|----------------------|---------------------------------------|----------------------|
| NH <sub>4</sub> <sup>+</sup> -N      | 50                   | ZnSO <sub>4</sub> ·7H <sub>2</sub> O  | 0.43                 |
| NO <sub>3</sub> <sup>-</sup> -N      | 65                   | CoCl <sub>2</sub> ·6H <sub>2</sub> O  | 0.24                 |
| COD(CH <sub>3</sub> COONa)           | 195                  | MnCl <sub>2</sub> ·4H <sub>2</sub> O  | 0.99                 |
| KHCO <sub>3</sub>                    | 500                  | CuSO <sub>4</sub> ·5H <sub>2</sub> O  | 0.25                 |
| CaCl <sub>2</sub> ·2H <sub>2</sub> O | 180                  | NaMoO <sub>4</sub> ·2H <sub>2</sub> O | 0.22                 |
| MgSO <sub>4</sub> ·7H <sub>2</sub> O | 300                  | NiCl <sub>2</sub> ·6H <sub>2</sub> O  | 0.19                 |
| KH <sub>2</sub> PO <sub>4</sub>      | 30                   | H <sub>3</sub> BO <sub>4</sub>        | 0.014                |
| FeSO <sub>4</sub>                    | 5.0                  |                                       |                      |

**Table S2.** The operation conditions of reactors.

| Reactor  | Start-up (96 kPa) | Phase 96 kPa | Phase 72 kPa | Phase 65 kPa |
|----------|-------------------|--------------|--------------|--------------|
| SBR-PD   | 120 d             | 1-10 d       | 11-35 d      | 36-60 d      |
| SBR-A    | 35 d              | 1-35 d       | 36-70 d      | 71-105 d     |
| USR-PD/A | 50 d              | 1-10 d       | 11-40 d      | 41-70 d      |

**Table S3.** Microbial community richness and diversity of the PD/A system in end stage of different phases. R.96 kPa: sample at Phase 96 kPa (day 10); R.72 kPa: sample at Phase 72 kPa (day 45); R.65 kPa: sample at Phase 65 kPa (day 70).

| Sample description | OTUs | Richness |        | Diversity | Coverage |
|--------------------|------|----------|--------|-----------|----------|
|                    |      | Chao     | Ace    | Shannon   |          |
| R.96 kPa           | 104  | 115.50   | 121.78 | 3.66      | 0.994    |
| R.72 kPa           | 158  | 240.88   | 203.99 | 4.39      | 0.986    |
| R.65 kPa           | 131  | 147.73   | 151.65 | 3.87      | 0.992    |

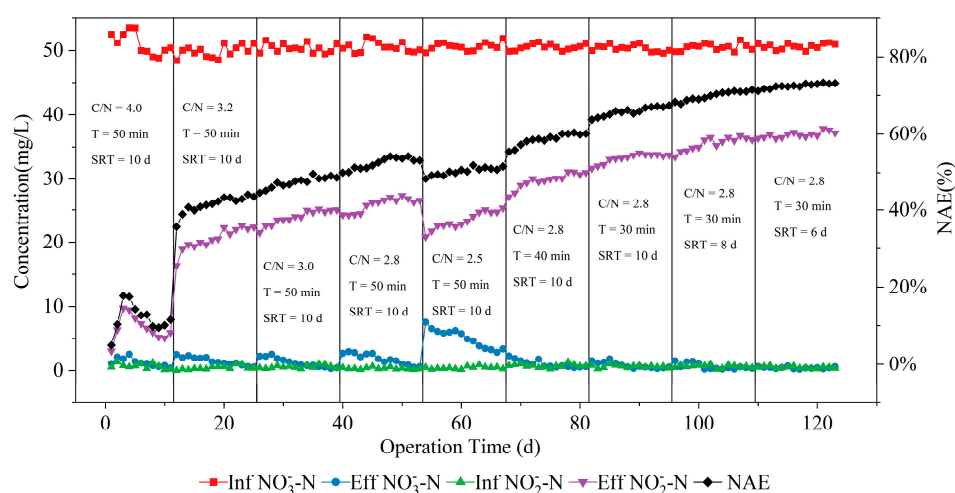**Figure S2.** Nitrogen removal performance of SBR-PD during the start-up period.

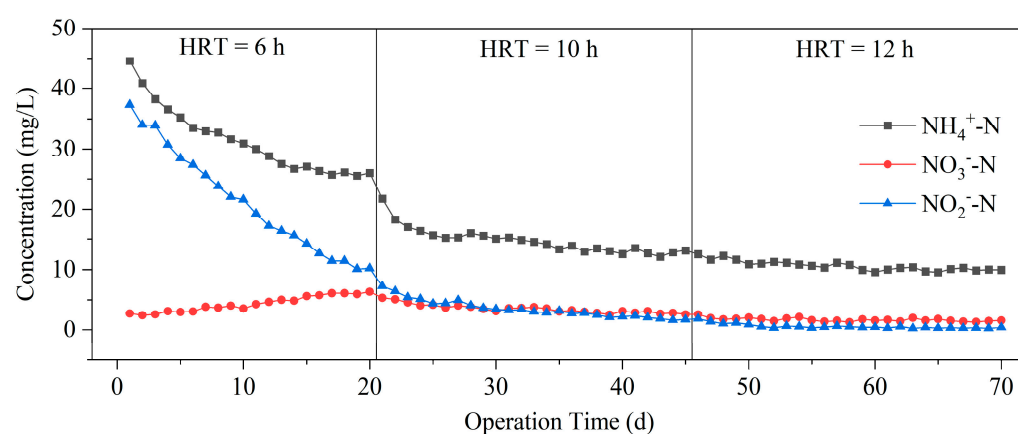

**Figure S3.** Nitrogen removal performance of PD/A system during the start-up period.
